# Supplementary material for: Construction and experimental validation of ferroptosis-related competing endogenous RNA networks in hepatocellular carcinoma based on WGCNA
Source: Research Square preprint supplement (doi:10.21203/rs.3.rs-1869613/v1), 2022-07-26
Supplement: Supplementary file 1 [file 56f139030d678b0e532cde47.docx]

| **Table S1: Genes in the selected gene sets** | |
| --- | --- |
| **Gene set** | **Gene symbol** |
| Autophagy | AMBRA1, APOL1, ARNT, ARSA, ARSB, ATF4, ATF6, ATG10, ATG12, ATG16L1, ATG16L2, ATG2A, ATG2B, ATG3, ATG4A, ATG4B, ATG4C, ATG4D, ATG5, ATG7, ATG9A, ATG9B, ATIC, BAG1, BAG3, BAK1, BAX, BCL2, BCL2L1, BECN1, BID, BIRC5, BIRC6, BNIP1, BNIP3, BNIP3L, ATG101, FAM215A, CALCOCO2, CAMKK2, CANX, CAPN1, CAPN10, CAPN2, CAPNS1, CASP1, CASP3, CASP4, CASP8, CCL2, CCR2, CD46, CDKN1A, CDKN1B, CDKN2A, CFLAR, CHMP2B, CHMP4B, CLN3, CTSB, CTSD, CTSL, CX3CL1, CXCR4, DAPK1, DAPK2, DDIT3, DIRAS3, DLC1, DNAJB1, DNAJB9, DRAM1, EDEM1, EEF2, EEF2K, EGFR, EIF2AK2, EIF2AK3, EIF2S1, EIF4EBP1, EIF4G1, ERBB2, ERN1, ERO1A, FADD, SUPT20H, FAS, FKBP1A, FKBP1B, FOS, FOXO1, FOXO3, GAA, GABARAP, GABARAPL1, GABARAPL2, GAPDH, GNAI3, RACK1, GOPC, GRID1, GRID2, HDAC1, HDAC6, HGS, HIF1A, HSP90AB1, HSPA5, HSPA8, HSPB8, IFNG, IKBKB, IKBKE, IL24, IRGM, ITGA3, ITGA6, ITGB1, ITGB4, ITPR1, RUBCN, ATG13, ATG14, KIF5B, KLHL24, LAMP1, LAMP2, MAP1LC3A, MAP1LC3B, MAP1LC3C, MAP2K7, MAPK1, MAPK3, MAPK8, MAPK8IP1, MAPK9, MBTPS2, MLST8, MTMR14, MTOR, MYC, NAF1, NAMPT, NBR1, NCKAP1, NFE2L2, NFKB1, NKX2-3, NLRC4, NPC1, NRG1, NRG2, NRG3, P4HB, PRKN, PARP1, PEA15, PELP1, PEX14, PEX3, PIK3C3, PIK3R4, PINK1, PPP1R15A, PRKAB1, PRKAR1A, PRKCD, PRKCQ, PTEN, PTK6, RAB11A, RAB1A, RAB24, RAB33B, RAB5A, RAB7A, RAC1, RAF1, RB1, RB1CC1, RELA, RGS19, RHEB, RPS6KB1, RPTOR, SAR1A, SERPINA1, SESN2, SH3GLB1, SIRT1, SIRT2, SPHK1, SPNS1, SQSTM1, ST13, STK11, TBK1, TM9SF1, VMP1, TMEM74, TNFSF10, TP53, TP53INP2, TP63, TP73, TSC1, TSC2, TUSC1, ULK1, ULK2, ULK3, USP10, UVRAG, VAMP3, VAMP7, VEGFA, WDFY3, WDR45, WDR45B, WIPI1, WIPI2, ZFYVE1 |
| Ferroptosis | FANCD2, NCOA4, TFRC, PHKG2, HSBP1, ACO1, FTH1, STEAP3, NFS1, IREB2, HMOX1, MT1G, ACSL4, AKR1C1, AKR1C2, AKR1C3, ALOX15, ALOX5, ALOX12, CARS1, CBS, CISD1, CS, DPP4, GPX4, HMGCR, LPCAT3, FDFT1, ACSL3, PEBP1, ZEB1, SQLE, FADS2, ACSF2, PTGS2, ACACA, GCLC, SLC7A11, KEAP1, NQO1, ABCC1, CHAC1, GSS, GCLM, NFE2L2, GLS2, SLC1A5, GOT1, G6PD, PGD, ATP5MC3, CD44, HSPB1, CRYAB, RPL8, SAT1, TP53, EMC2, AIFM2, NOX1 |
| Pyroptosis | PJVK, CASP9, NOD1, PLCG1, NLRP1, GSDME, ELANE, PRKACA, GSDMB, SCAF11, TIRAP, CASP4, GSDMD, GPX4, NLRP7, NLRP2, CASP3, CASP6, TNF, IL1B, IL18, CASP8, NLRP6, GSDMA, GSDMC, PYCARD, CASP5, AIM2, NOD2, NLRC4, NLRP3, IL6, CASP1 |
